# Supplementary material for: A two-photon off-on fluorescence probe for imaging thiols in live cells and tissues
Source: Royal Society of Chemistry journal article supplement (doi:10.1039/c5pp00468c), 2016-02-12
Supplement: c5pp00468c1.pdf [file c5pp00468c1.pdf]

## Supplementary Material

### A two-photon off-on fluorescence probe for imaging thiols in live cells and tissues

Xinyue Zhu,<sup>a</sup> **Yan Li**,<sup>a</sup> **Wenyan Zan**,<sup>a</sup> **Jianjian Zhang**,<sup>a</sup> Zhenjie Chen,<sup>b</sup> Xiaoyan Liu,  
Fengchao Qi,<sup>a</sup> **Xiaojun Yao**,<sup>a</sup> Xiaoyu Zhang<sup>b</sup> and Haixia Zhang<sup>\*a</sup>

<sup>a</sup> Key Laboratory of Nonferrous Metal Chemistry and Resources Utilization of Gansu Province,  
College of Chemistry and Chemical Engineering, Lanzhou University, Lanzhou 730000, China

<sup>b</sup> Institute of Physiology, School of Basic Medical Sciences, Lanzhou University, Lanzhou 730000,  
China

\* Corresponding author. E-mail address: zhanghx@lzu.edu.cn

Tel: +86-931-8912058; Fax: +86-931-8912582

#### List

##### 1. Sensing Mechanism of **Z1** with Thiols

Scheme S1. Proposed mechanism of **Z1** response to Cys

Figure S1. HRMS of probe **Z1**

Figure S2. HRMS of probe **Z1** with adding excess of Cys2.

Figure S3. UV-Vis absorption spectra of probe **Z1** toward Cys/ Hcy/GSH

Figure S4. Fluorescence change of probe **Z1** toward different reaction time

Figure S5. OP fluorescence spectra of probe **Z1** toward Hcy/GSH

##### 3. Measurement of Two-Photon TPA Value

##### 4. Characteristic of Probe **Z1**

Figure S6-S11. <sup>1</sup>H NMR and <sup>13</sup>C NMR spectra of the compounds produced in the  
synthesis procedure of **Z1**

## 1. Sensing Mechanism of Z1 with Thiols

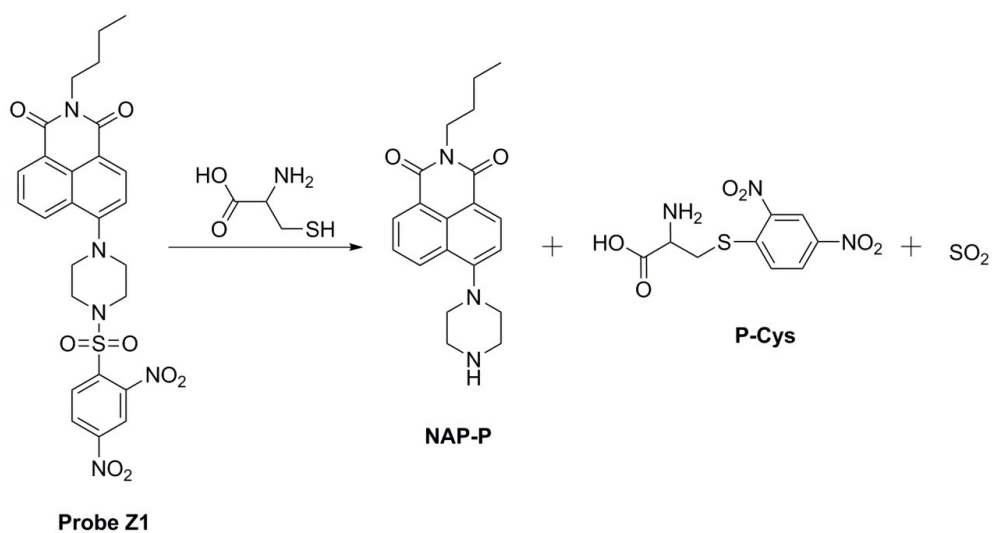

Scheme S1. Proposed mechanism of Z1 responding to Cys

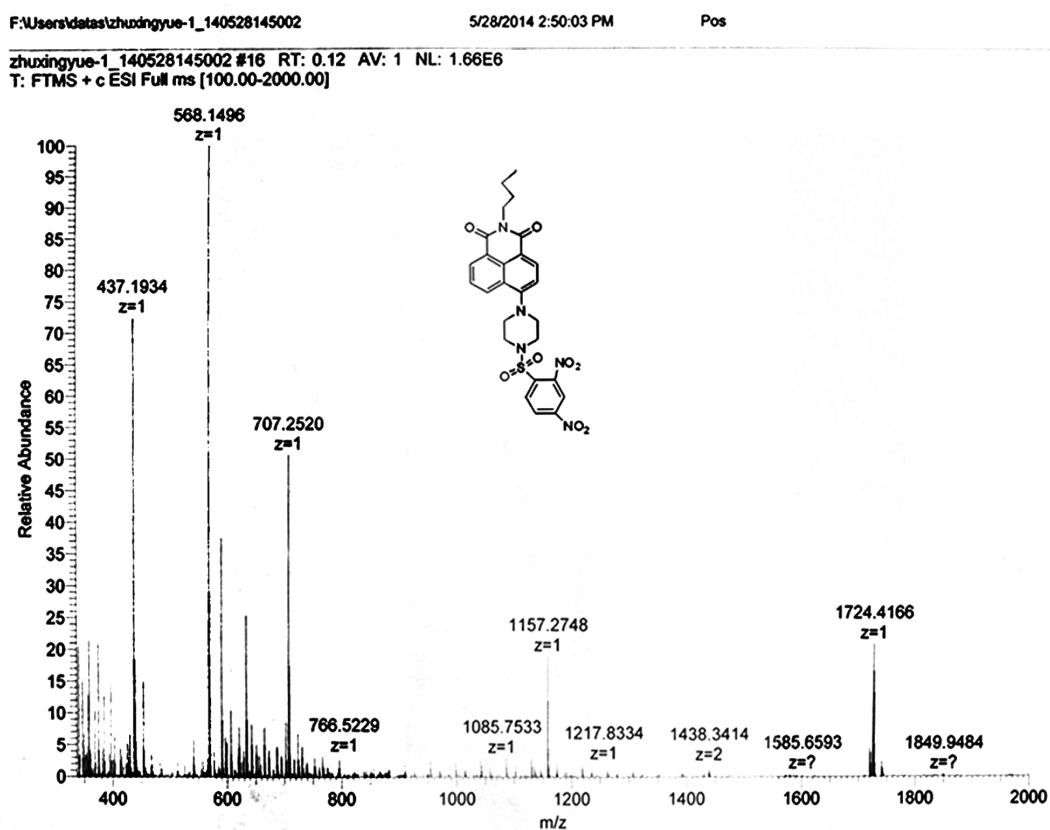

Figure S1. HRMS of probe Z1.

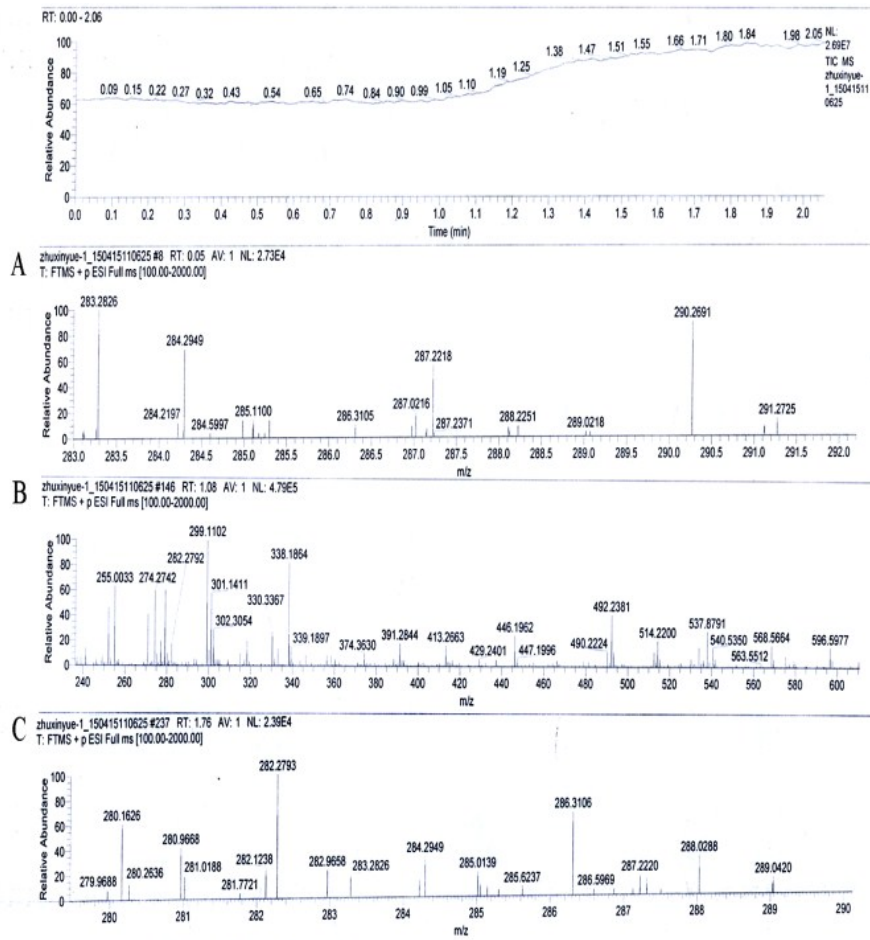

**Figure S2.** HRMS of probe **Z1** adding with excess of Cys.

## 2. Spectroscopic Measurement

### UV-Vis absorption spectra

The UV-Vis absorption spectra of probe **Z1** toward Cys/Hcy/GSH were examined. as displayed in Figure S2, the UV-Vis absorption of **Z1** increased with the increasing concentration of three kinds of analytes at around 409 nm.

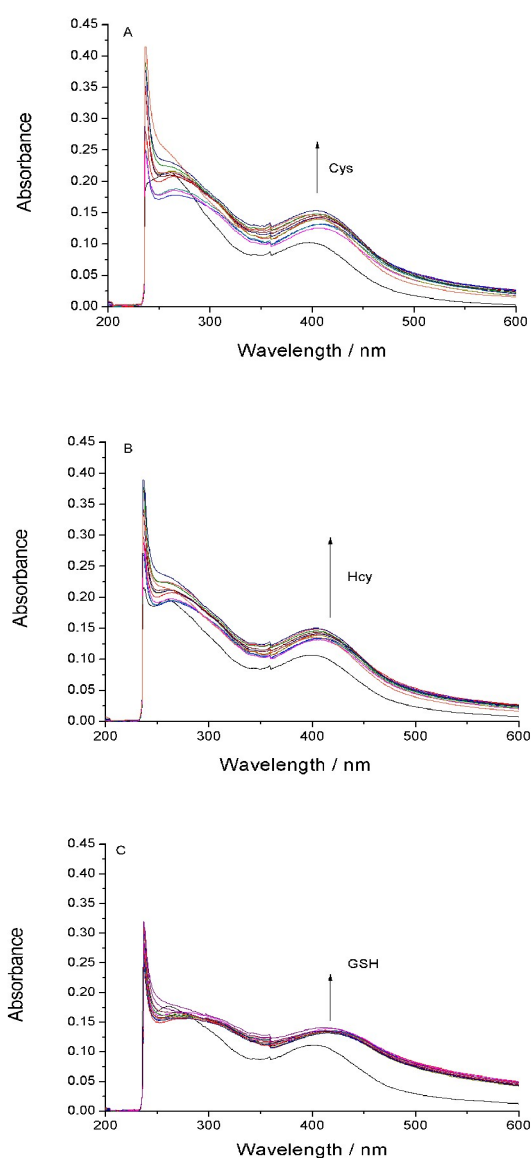

**Figure S3.** UV-Vis absorption spectra change of probe **Z1** (10  $\mu\text{M}$ ) toward Cys (A)/Hcy (B)/GSH (C) with different concentrations (2.0, 4.0, 6.0, 8.0, 10, 20, 40, 60, 80, 100, 150, 200  $\mu\text{M}$ , bottom to up). (20 mM PBS, pH 7.4, 5% DMSO,  $\lambda_{\text{ex}} = 409 \text{ nm}$ )

## Fluorescence spectra

The fluorescence change of probe **Z1** toward different reaction times.

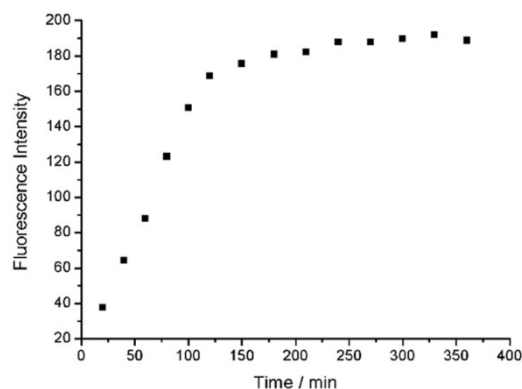

**Figure S4.** Fluorescence change of **Z1** toward different reaction times (probe **Z1**: 10 $\mu$ M, Cys: 100  $\mu$ M).

The Fluorescence spectra of probe **Z1** toward Hcy/GSH were obtained using the method described in text. The fluorescence intensities increased with the increasing concentration of Hcy/GSH at around 530 nm.

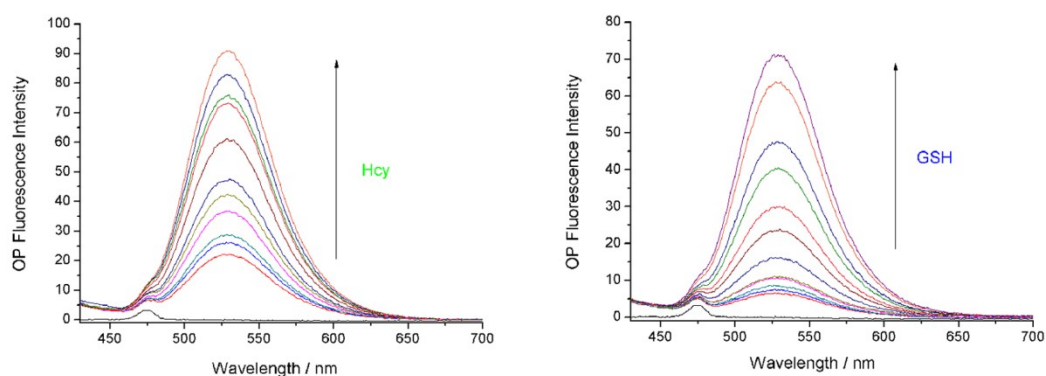

**Figure S5.** OP fluorescence spectra of probe **Z1** (10  $\mu$ M) toward Hcy (A)/GSH (B) with different concentrations (2.0, 4.0, 6.0, 8.0, 10, 20, 40, 60, 80, 100, 150, 200 $\mu$ M, bottom to up). (20 mM PBS, pH 7.4, 5% DMSO,  $\lambda_{ex}$  = 409 nm).

#### 4. Measurement of Two-Photon TPA Value

The two-photon absorption cross section ( $\delta$ ) was determined by using femto second (fs) fluorescence measurement technique as described.<sup>1</sup> To measure the two-photon absorption cross section ( $\delta$ ) of the reaction product of probe **Z1** ( $5.0 \times 10^{-6}$  M) and Cys ( $1.0 \times 10^{-4}$  M), the reaction mixture dissolved in 20 mM PBS (5% DMSO, pH 7.4) was kept at 37°C for 2 h before the measurement was conducted (**NAP-P**, QY%: 11.11). The two-photon induced fluorescence intensity was measured at 700-880 nm by using Rhodamine 6G ( $1.3 \times 10^{-6}$  M, QY%: 95, ethyl alcohol) as the reference, whose two-photon property has been well characterized in the literature.<sup>2</sup> The intensities of the two-photon induced fluorescence spectra of the reference and sample emitted at the same excitation wavelength were determined. The TPA cross section was calculated according to Equation S1.

$$\delta_s = \delta_r \frac{\phi_r C_r n_r S_s}{\phi_s C_s n_s S_r} \quad (\text{Equation S1})$$

Where the subscript s and r stood for **Z1** and reference (Rhodamine 6G), respectively.  $\delta$  was the TPA value,  $\phi$  was the fluorescence quantum yield,  $n$  was the refractive index of the solvents,  $C$  was the concentration and  $S$  represented the intensity of TPE fluorescence emission.

#### References

1. M. A. Albota, C. Xu, W. W. Webb, *Applied Optics*, 1998, **37**, 7352-7356.
2. N. S. Makarov, M. Drobizhev, A. Rebane, *Opt. Express*, 2008, **16**, 4029-4047.

# 1. Characteristic of Z1

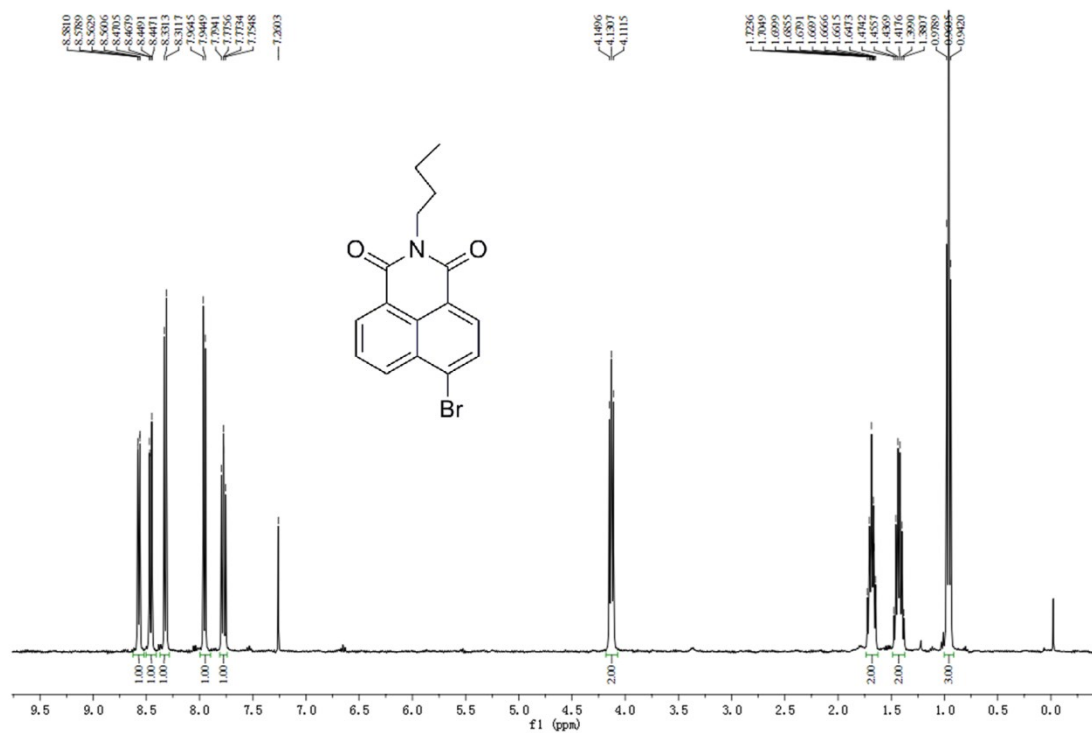

Figure S6. <sup>1</sup>H NMR spectrum of compound 1 in CDCl<sub>3</sub>.

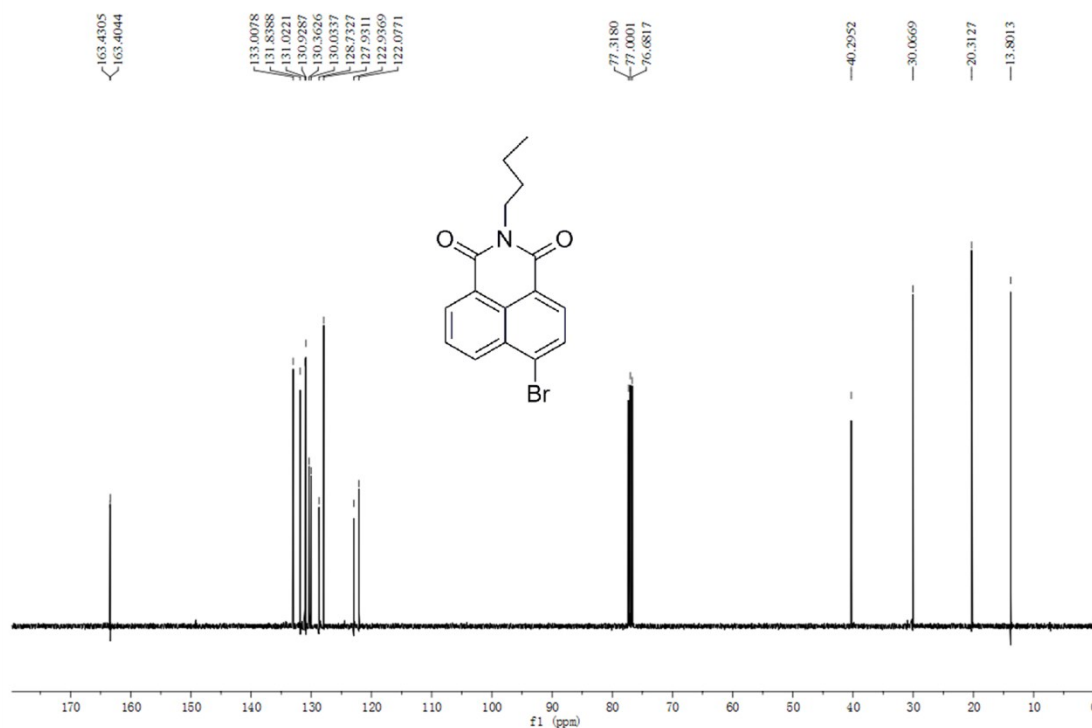

Figure S7. <sup>13</sup>C NMR spectrum of compound 1 in CDCl<sub>3</sub>.

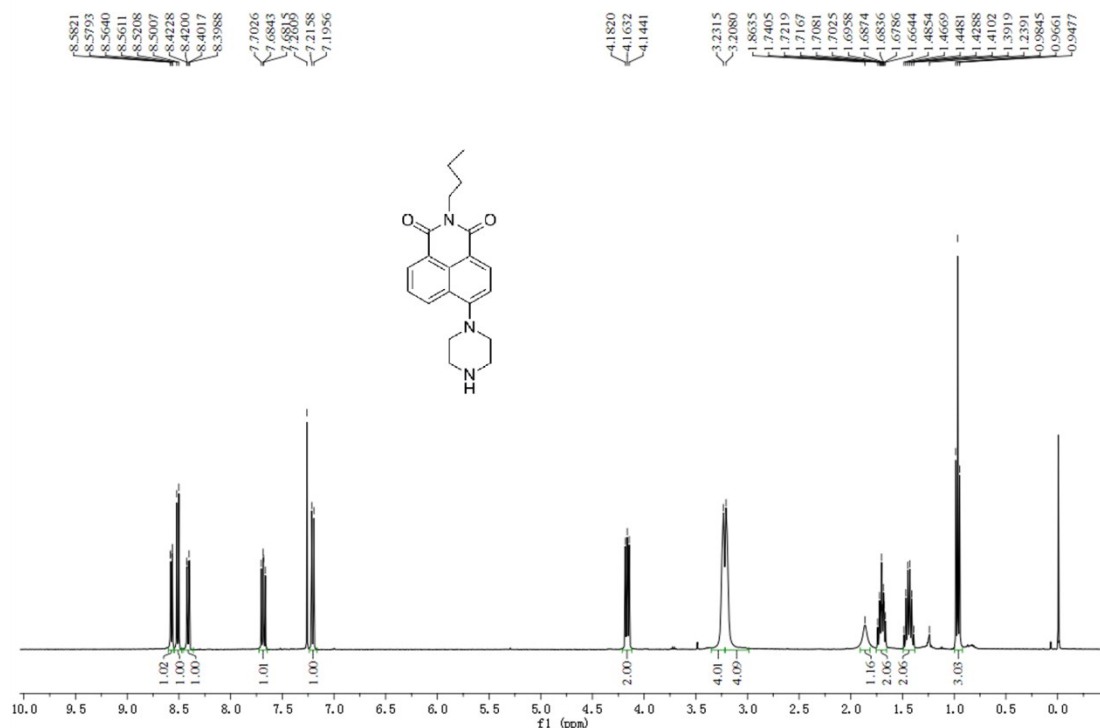

Figure S8. <sup>1</sup>H NMR spectrum of NAP-P in CDCl<sub>3</sub>.

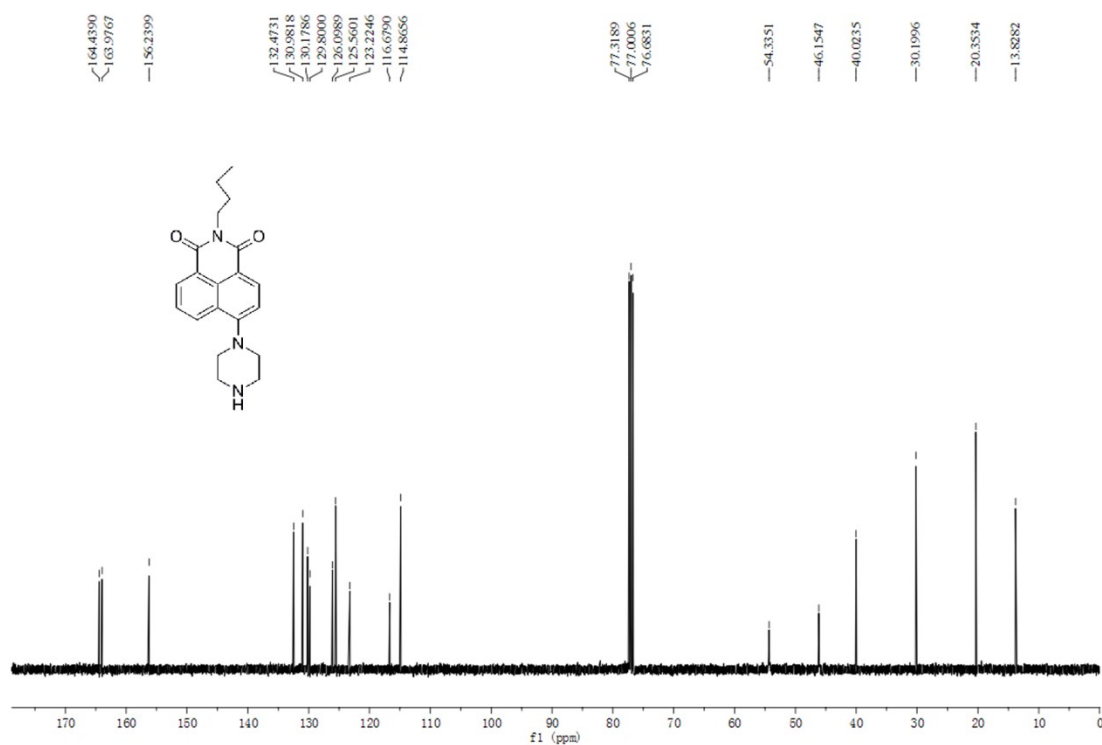

Figure S9. <sup>13</sup>C NMR spectrum of NAP-P in CDCl<sub>3</sub>.



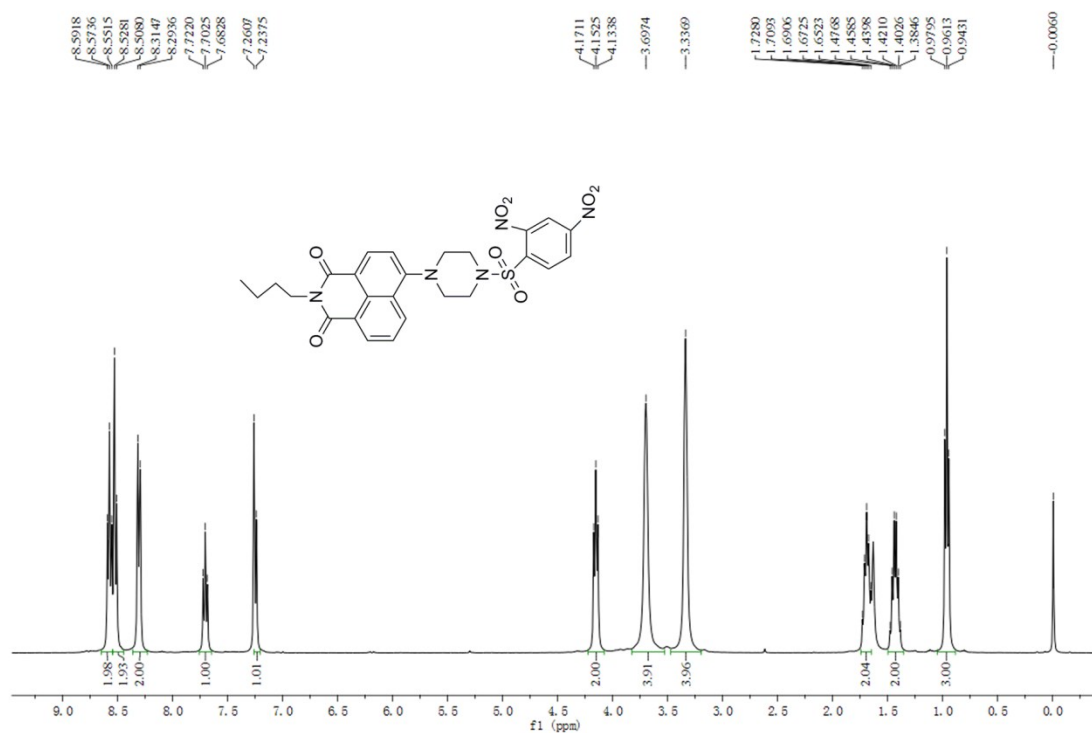

**Figure S10.** <sup>1</sup>H NMR spectrum of probe **Z1** in CDCl<sub>3</sub>.

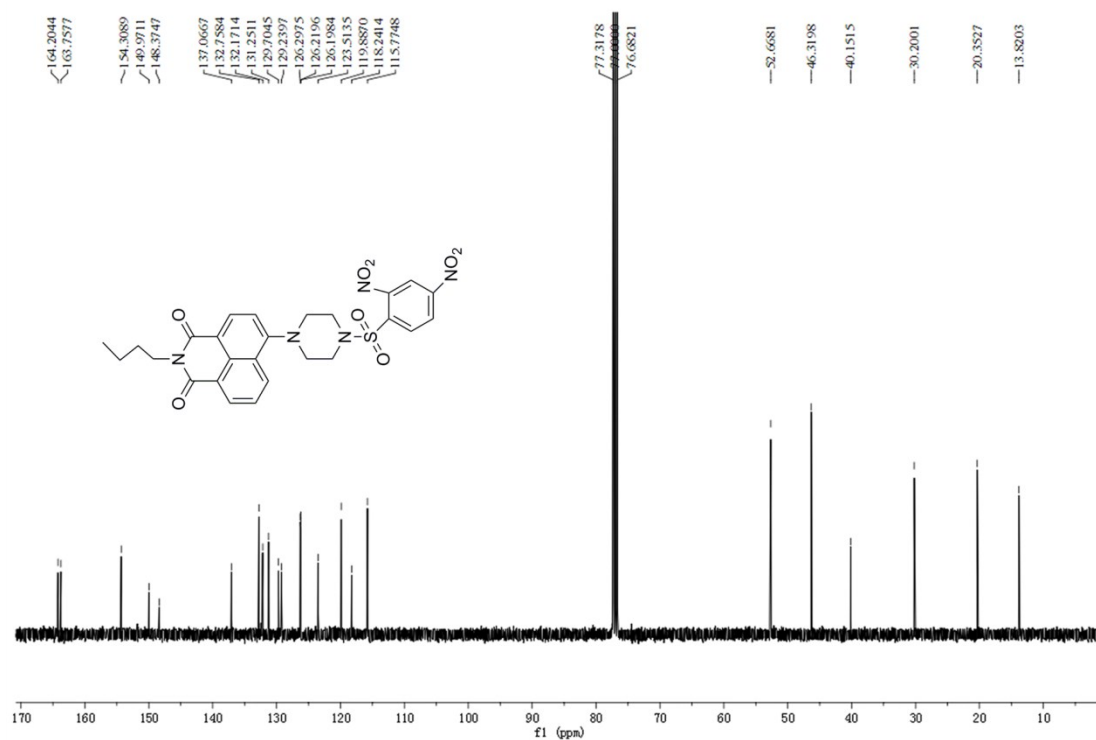

**Figure S11.** <sup>13</sup>C NMR spectrum of probe **Z1** in CDCl<sub>3</sub>.
